# Supplementary material for: Caudal Regulates the Spatiotemporal Dynamics of Pair-Rule Waves in Tribolium
Source: PubMed Central journal article supplement (PMC4199486; doi:10.1371/journal.pgen.1004677), 2014-10-16
Supplement: pgen.1004677.s002.pdf [file pgen.1004677.s002.pdf]

Time  
(unit time = total simulation time)
