# Supplementary material for: Caudal Regulates the Spatiotemporal Dynamics of Pair-Rule Waves in Tribolium
Source: PubMed Central journal article supplement (PMC4199486; doi:10.1371/journal.pgen.1004677), 2014-10-16

**A**

**wt**

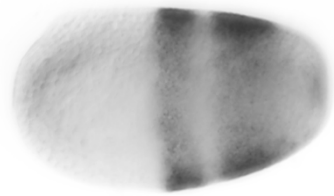

**severe *cad*  
RNAi**

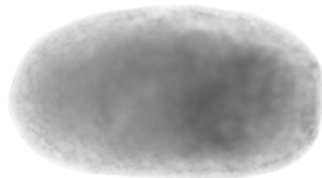

**B**

**first *eve* stripe  
splits in a mild *cad*  
RNAi embryo**

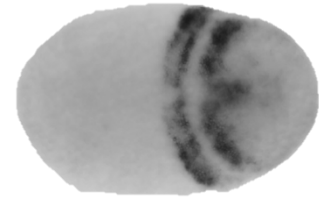

**first *eve* stripe  
does not split in a  
mild *cad* RNAi  
embryo**

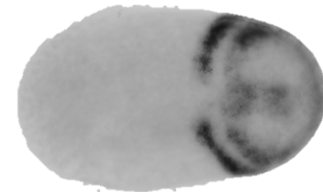

Supplement: pgen.1004677.s003.pdf [file pgen.1004677.s003.pdf]
